# Supplementary material for: Synthesis of functionalized macrocyclic derivatives of trioxabicyclo[3.3.0]nonadiene
Source: publisher site journal article supplement (doi:10.3762/bjoc.8.83), 2012-05-15
Supplement: Additional file 1 [file 1860-5397-8-83-S1.pdf]

**Supporting Information**  
**for**  
**Synthesis of functionalized macrocyclic derivatives of**  
**trioxabicyclo[3.3.0]nonadiene**

Sabine Leber<sup>1,2</sup>, Gert Kollenz\*<sup>1</sup> and Curt Wentrup\*<sup>2</sup>

Address: <sup>1</sup>Institute of Chemistry, Karl-Franzens University of Graz, Heinrichstrasse 28,  
A-8010 Graz, Austria and <sup>2</sup>School of Chemistry and Molecular Biosciences, The  
University of Queensland, Brisbane, QLD 4072, Australia

Email: Gert Kollenz - gert.kollenz@uni-graz.at; Curt Wentrup - wentrup@uq.edu.au

\* Corresponding author

**Drawings of the *R* and *S* enantiomers of 3 and the *R,S* (*meso*), *R,R*, and  
*S,S* diastereoisomers of the bisdioxine macrocycles.**

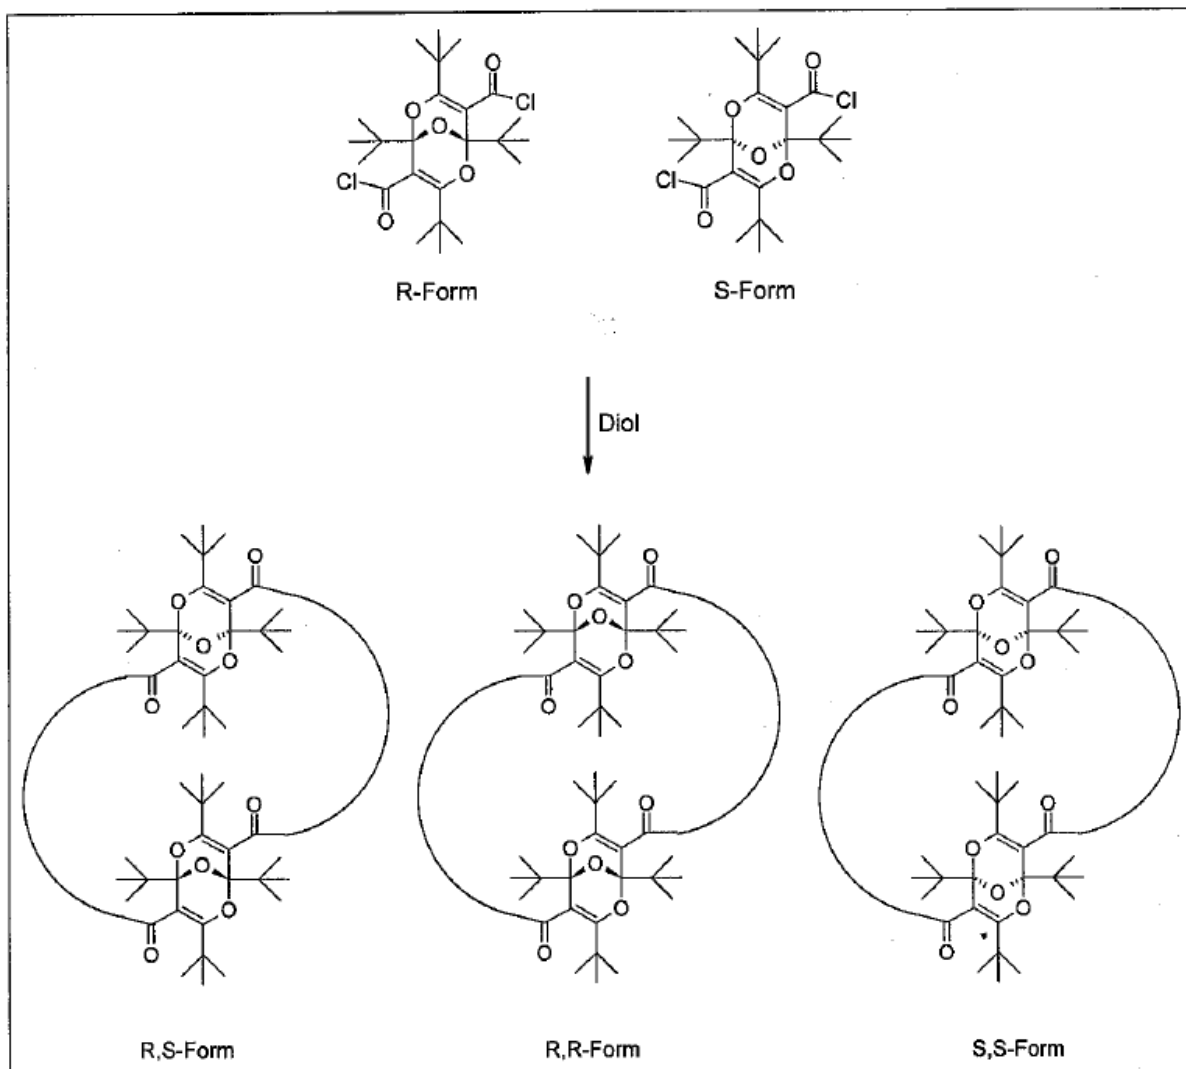

**Figure S1:** Drawings of the *R* and *S* enantiomers of bisdioxine **3** and the *R,S* (*meso*), *R,R*, and *S,S* diastereoisomers of the bisdioxine macrocycles.
