# Supplementary material for: Synthesis of functionalized macrocyclic derivatives of trioxabicyclo[3.3.0]nonadiene
Source: publisher site journal article supplement (doi:10.3762/bjoc.8.83), 2012-05-15
Supplement: Additional file 2 [file 1860-5397-8-83-S2.pdf]

# Supporting Information

## for

### Synthesis of functionalized macrocyclic derivatives of trioxabicyclo[3.3.0]nonadiene

Sabine Leber<sup>1,2</sup>, Gert Kollenz\*<sup>1</sup> and Curt Wentrup\*<sup>2</sup>

Address: <sup>1</sup>Institute of Chemistry, Karl-Franzens University of Graz, Heinrichstrasse 28, A-8010 Graz, Austria and <sup>2</sup>School of Chemistry and Molecular Biosciences, The University of Queensland, Brisbane, QLD 4072, Australia

Email: Gert Kollenz - gert.kollenz@uni-graz.at; Curt Wentrup - wentrup@uq.edu.au

\* Corresponding author

**Assignment of <sup>1</sup>H NMR spectra and copies of <sup>13</sup>C NMR spectra of 8, 11, and 13.**

#### Content:

|                                                                                                                             |    |
|-----------------------------------------------------------------------------------------------------------------------------|----|
| <b>Figure S2.</b> Assignment of <sup>1</sup> H NMR signals for compound <b>8</b> .....                                      | S2 |
| <b>Figure S3.</b> Assignment of <sup>1</sup> H NMR signals for compound <b>11</b> .....                                     | S3 |
| <b>Figure S4.</b> <sup>13</sup> C NMR spectrum of compound <b>8</b> .....                                                   | S4 |
| <b>Figure S5.</b> <sup>13</sup> C NMR spectrum of compound <b>11</b> .....                                                  | S5 |
| <b>Figure S6.</b> <sup>13</sup> C NMR and HSQC <sup>1</sup> H/ <sup>13</sup> C NMR correlation for compound <b>13</b> ..... | S6 |

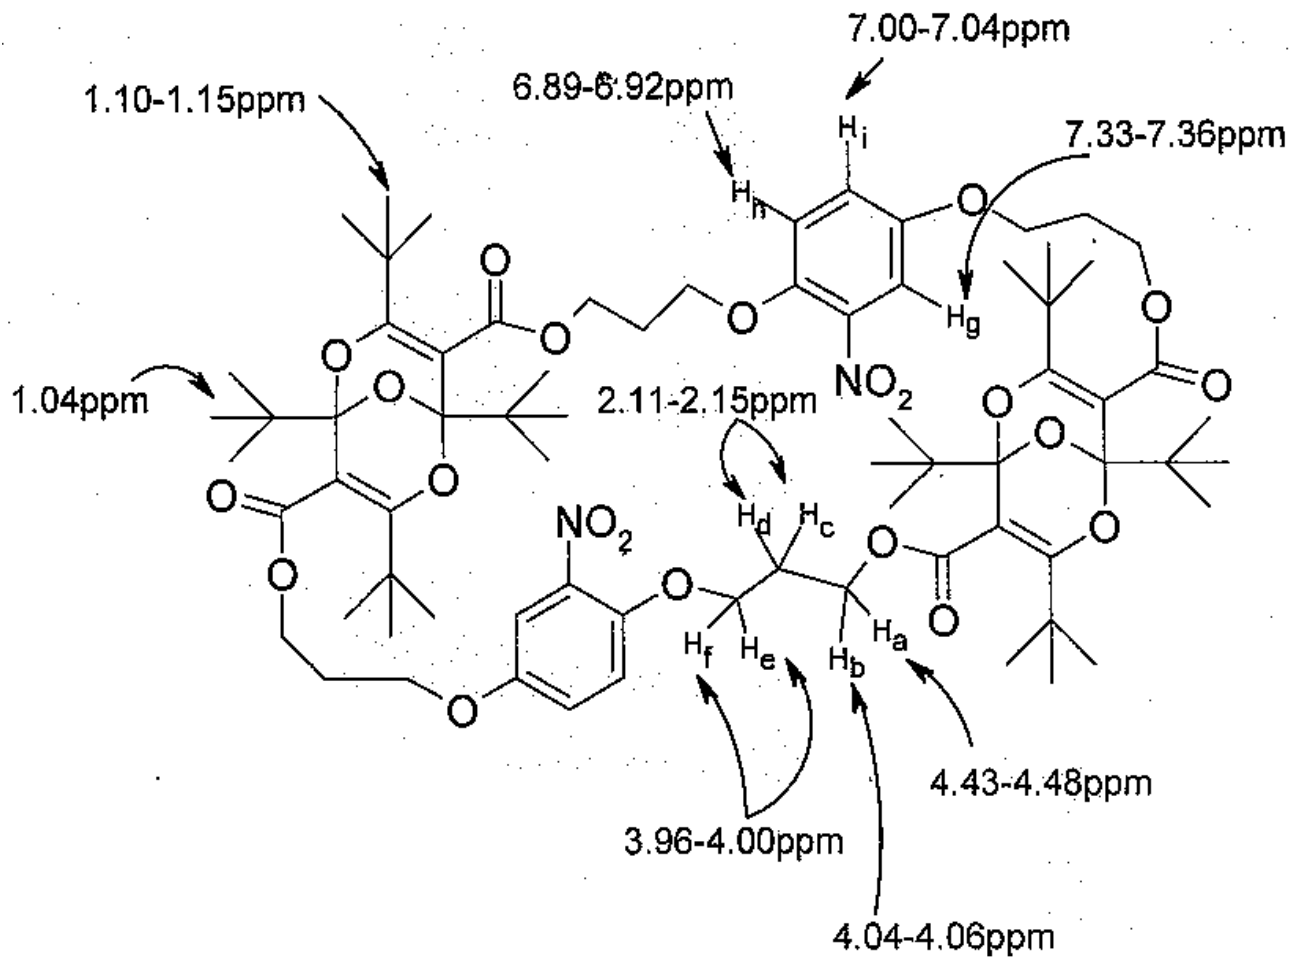

**Figure S2:** Assignment of  $^1\text{H}$  NMR signals for compound 8.

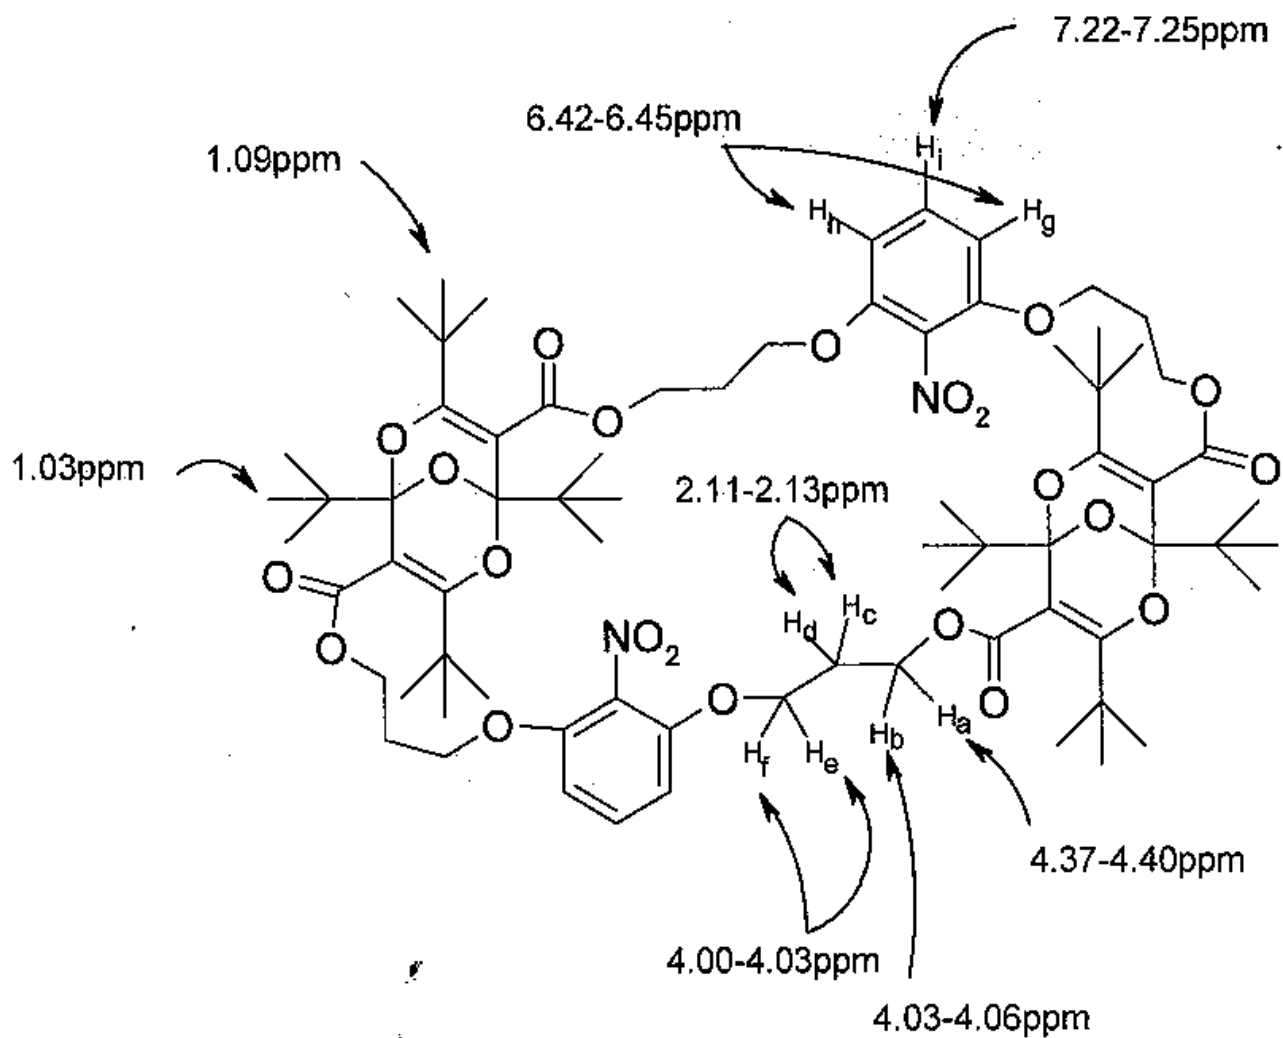

**Figure S3:** Assignment of  $^1\text{H}$  NMR signals for compound **11**.

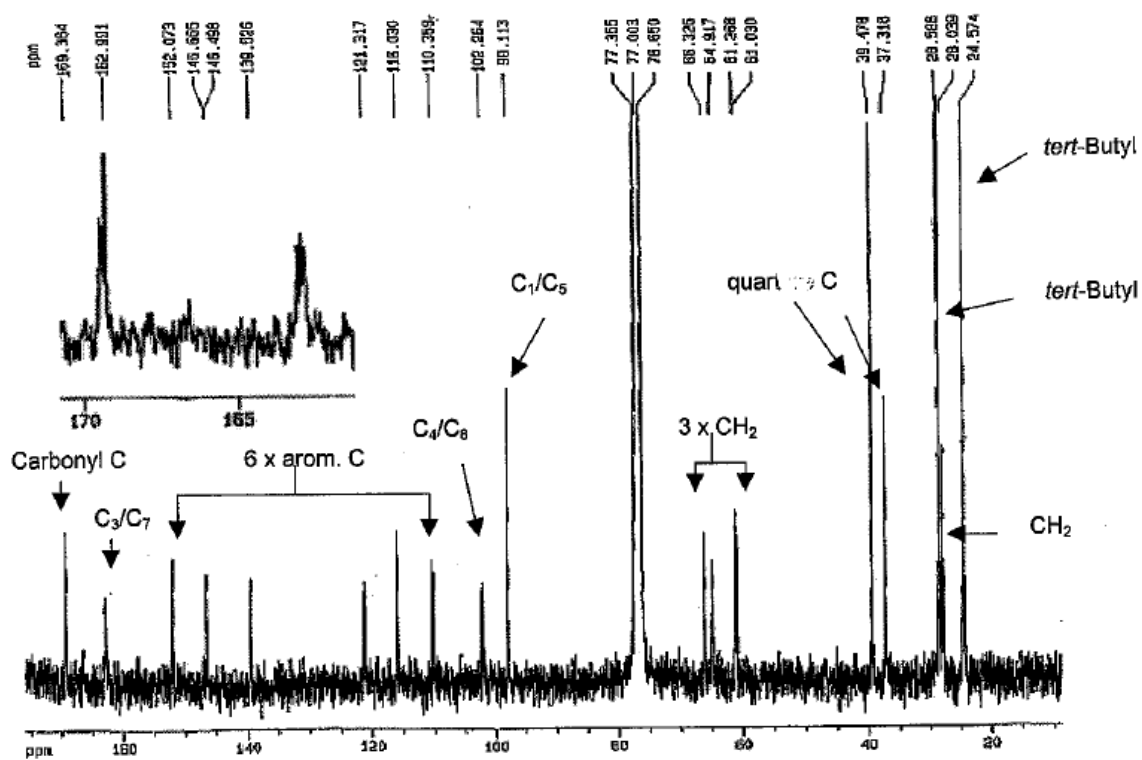

**Figure S4:**  $^{13}\text{C}$  NMR spectrum of compound **8**. C<sub>1</sub>/C<sub>5</sub>, C<sub>3</sub>/C<sub>7</sub> and C<sub>4</sub>/C<sub>8</sub> refer to the bisdioxine unit.

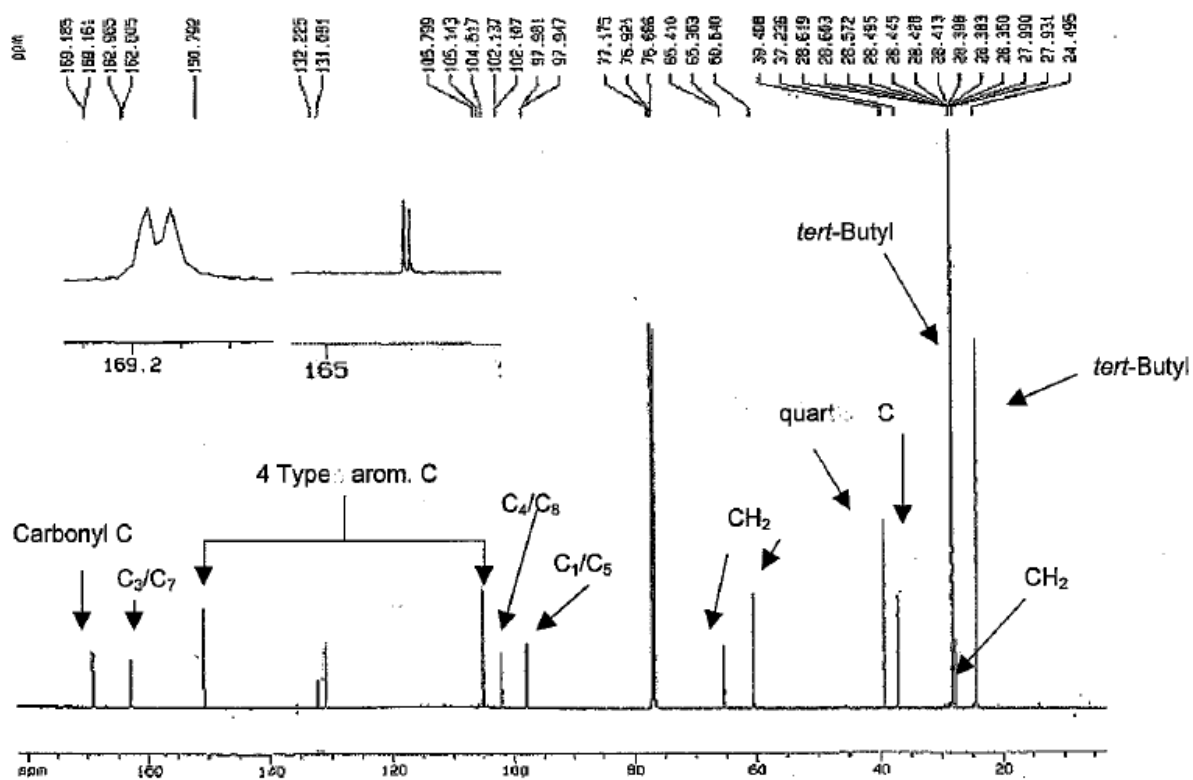

**Figure S5:**  $^{13}\text{C}$  NMR spectrum of compound **11**. C1/C5, C3/C7 and C4/C8 refer to the bisdioxine unit.

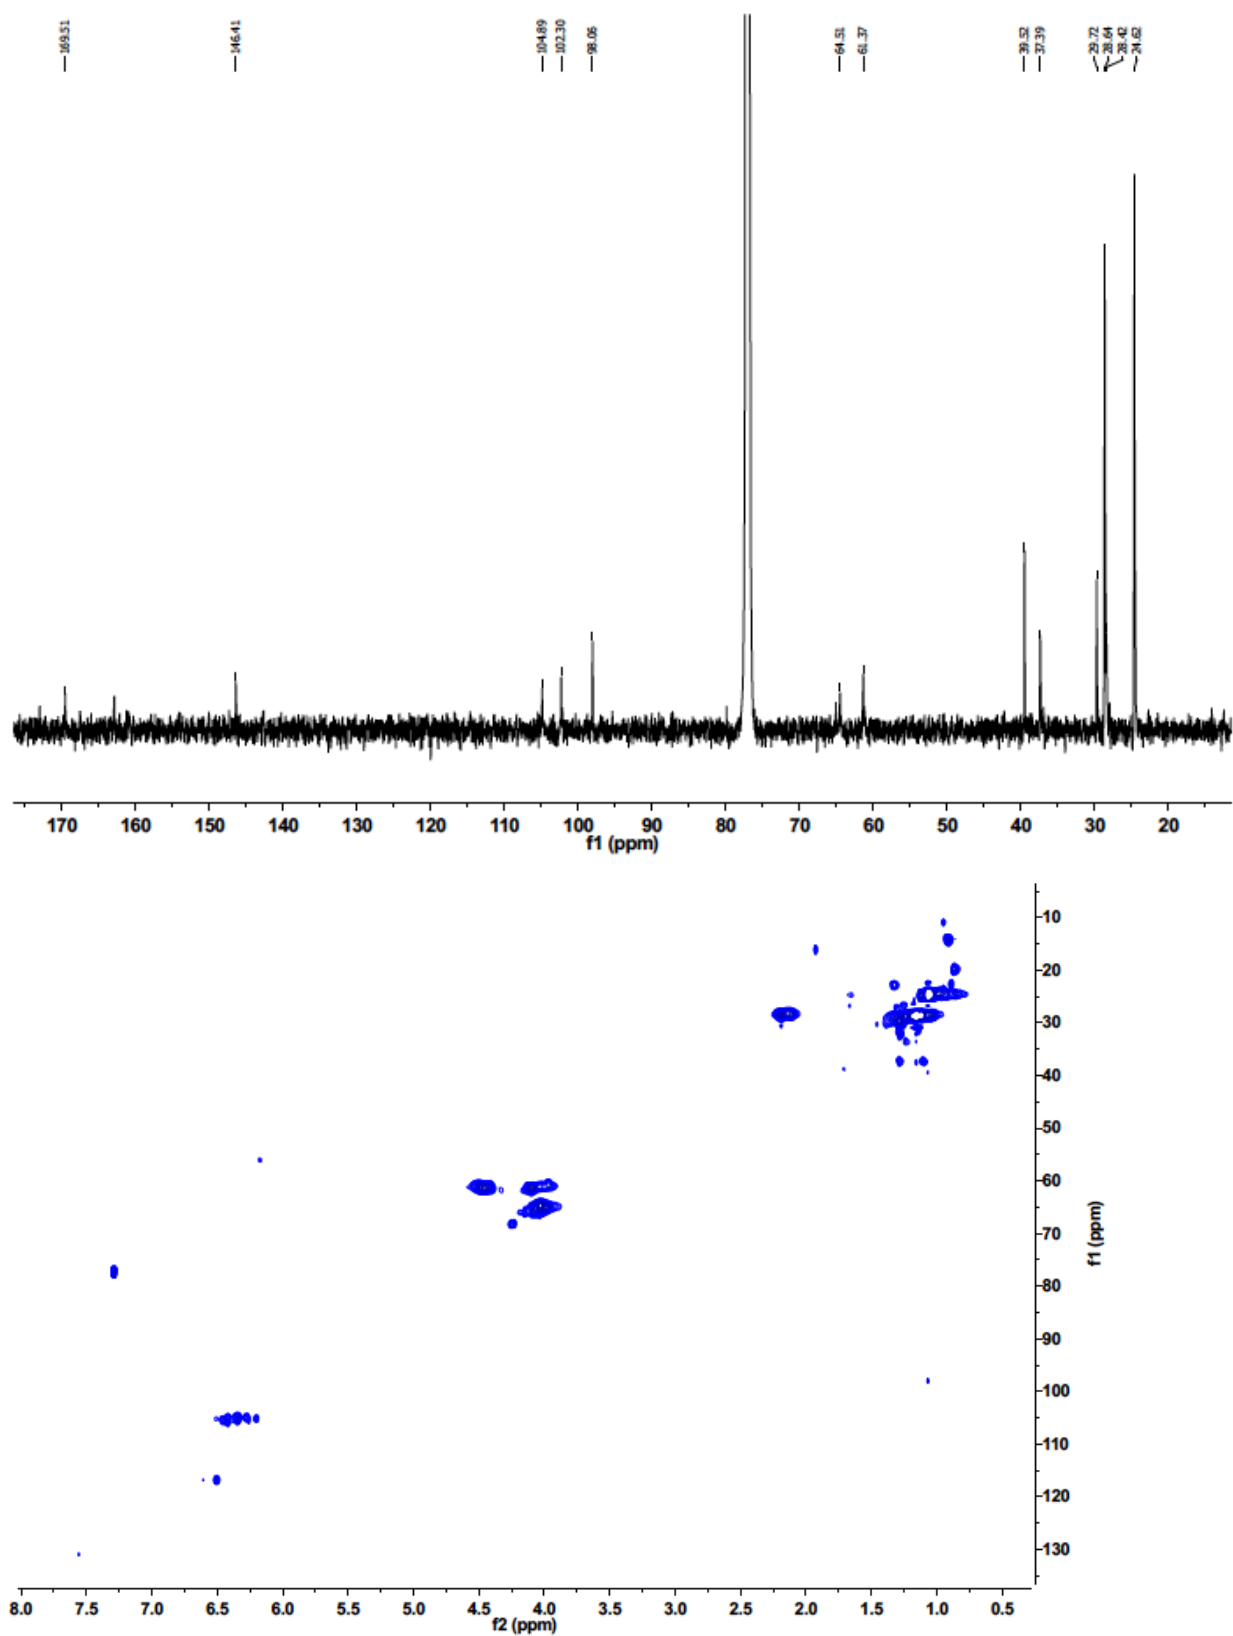

**Figure S6:**  $^{13}\text{C}$  NMR and HSQC  $^1\text{H}/^{13}\text{C}$  NMR correlation for compound **13**.
